# Supplementary material for: Analysis on Acupoint Selection and Combination for Amyotrophic Lateral Sclerosis Treated with Acupuncture Based on Data Mining
Source: PubMed Central journal article supplement (PMC9200494; doi:10.1155/2022/6541600), 2022-06-08
Supplement: 6541600.f1.pdf [file 6541600.f1.pdf]

## **Appendix 1: Search strategy used in PubMed database**

#1 randomized controlled trial [pt]

#2 controlled clinical trial [pt]

#3 clinical trials [MeSH]

#4 randomized [tiab]

#5 trial [ti]

#6 randomly [tiab]

#7 placebo [tiab]

#8 #1 OR #2 OR #3 OR #4 OR #5 OR #6 OR #7

#9 humans [MeSH]

#10 #8 and #9

#11 amyotrophic lateral sclerosis [MeSH]

#12 motor neuron disease [MeSH]

#13 (ALS or MND): ti,ab

#14 #11 or #12 or #13

#15 acupuncture therapy (MeSH)

#16 (acupuncture or electroacupuncture or manual acupuncture or acupoint or meridian or scalp acupuncture or elongated acupuncture or abdominal acupuncture):

ti,ab

#17 #15 or #16

#18 #10 and #14 and #17

## Appendix 2: Acupoint combinations by means of complex network analysis (weight $\geq$ 30).

| Order | Acupoint             | Combinations           | Weight |
|-------|----------------------|------------------------|--------|
| 1     | Hegu (LI 4)          | — Zusanli (ST 36)      | 75     |
| 2     | Quchi (LI 11)        | — Zusanli (ST 36)      | 66     |
| 3     | Quchi (LI 11)        | — Hegu (LI 4)          | 65     |
| 4     | Zusanli (ST 36)      | — Sanyinjiao (SP 6)    | 54     |
| 5     | Hegu (LI 4)          | — Sanyinjiao (SP 6)    | 54     |
| 6     | Quchi (LI 11)        | — Sanyinjiao (SP 6)    | 49     |
| 7     | Qihai (RN 6)         | — Hegu (LI 4)          | 40     |
| 8     | Hegu (LI 4)          | — Yanglingquan (GB 34) | 40     |
| 9     | Zusanli (ST 36)      | — Yanglingquan (GB 34) | 40     |
| 10    | Qihai (RN 6)         | — Zusanli (ST 36)      | 40     |
| 11    | Hegu (LI 4)          | — Jianyu (LI 15)       | 38     |
| 12    | Zusanli (ST 36)      | — Jiexi (ST 41)        | 38     |
| 13    | Zusanli (ST 36)      | — Jianyu (LI 15)       | 38     |
| 14    | Hegu (LI 4)          | — Jiexi (ST 41)        | 38     |
| 15    | Pishu (BL 20)        | — Zusanli (ST 36)      | 37     |
| 16    | Qihai (RN 6)         | — Quchi (LI 11)        | 36     |
| 17    | Shenshu (BL 23)      | — Zusanli (ST 36)      | 36     |
| 18    | Quchi (LI 11)        | — Jiexi (ST 41)        | 35     |
| 19    | Ganshu (BL 18)       | — Zusanli (ST 36)      | 35     |
| 20    | Quchi (LI 11)        | — Jianyu (LI 15)       | 35     |
| 21    | Hegu (LI 4)          | — Zhongwan (RN 12)     | 34     |
| 22    | Pishu (BL 20)        | — Hegu (LI 4)          | 34     |
| 23    | Zusanli (ST 36)      | — Zhongwan (RN 12)     | 34     |
| 24    | Neiguan (PC 6)       | — Zusanli (ST 36)      | 34     |
| 25    | Guanyuan (RN 4)      | — Zusanli (ST 36)      | 33     |
| 26    | Neiguan (PC 6)       | — Hegu (LI 4)          | 33     |
| 27    | Qihai (RN 6)         | — Sanyinjiao (SP 6)    | 33     |
| 28    | Shousanli (LI 10)    | — Zusanli (ST 36)      | 33     |
| 29    | Shenshu (BL 23)      | — Hegu (LI 4)          | 33     |
| 30    | Hegu (LI 4)          | — Futu (ST 32)         | 33     |
| 31    | Guanyuan (RN 4)      | — Hegu (LI 4)          | 33     |
| 32    | Zusanli (ST 36)      | — Futu (ST 32)         | 32     |
| 33    | Ganshu (BL 18)       | — Hegu (LI 4)          | 32     |
| 34    | Quchi (LI 11)        | — Zhongwan (RN 12)     | 32     |
| 35    | Shousanli (LI 10)    | — Hegu (LI 4)          | 32     |
| 36    | Guanyuan (RN 4)      | — Quchi (LI 11)        | 31     |
| 37    | Quchi (LI 11)        | — Yanglingquan (GB 34) | 31     |
| 38    | Quchi (LI 11)        | — Futu (ST 32)         | 31     |
| 39    | Pishu (BL 20)        | — Quchi (LI 11)        | 31     |
| 40    | Yanglingquan (GB 34) | — Sanyinjiao (SP 6)    | 31     |
| 41    | Waiguan (SJ 5)       | — Hegu (LI 4)          | 30     |
| 42    | Hegu (LI 4)          | — Jiaji (EX-B2)        | 30     |
| 43    | Sanyinjiao (SP 6)    | — Zhongwan (RN 12)     | 30     |
| 44    | Zusanli (ST 36)      | — Jiaji (EX-B2)        | 30     |

**Appendix 3: Acupoint combinations by means of association rule analysis from acupoints (> 10 times).**

| Acupoint                          | Combinations                 | Support | Confidence | Lift |
|-----------------------------------|------------------------------|---------|------------|------|
| Quchi (LI 11)——                   | Hegu (LI 4), Zusanli (ST 36) | 0.52    | 1          | 1.5  |
| Sanyinjiao (SP 6)——               | Hegu (LI 4), Zusanli (ST 36) | 0.43    | 0.9        | 1.35 |
| Shousanli (LI 10)——               | Hegu (LI 4), Zusanli (ST 36) | 0.31    | 1          | 1.5  |
| Jianyu (LI15), Shousanli (LI10)—— | Hegu (LI 4)                  | 0.31    | 1          | 1.5  |
| Ganshu (BL 18)——                  | Shenshu (BL 23)              | 0.31    | 1          | 3.0  |
| Qihai (RN 6)——                    | Sanyinjiao (SP 6)            | 0.31    | 0.93       | 1.95 |
| Shenshu (BL 23)——                 | Zusanli (ST 36)              | 0.31    | 0.93       | 1.39 |
| Shenshu (BL 23)——                 | Ganshu (BL 18)               | 0.31    | 0.93       | 3.0  |
| Shousanli (LI10), Jianyu (LI15)—— | Quchi (LI 11)                | 0.29    | 0.92       | 1.76 |
| Jianyu (LI 15), Ganshu (BL 18)——  | Zusanli (ST 36)              | 0.29    | 0.92       | 1.38 |
| Jiexi (ST 41)——                   | Quchi (LI 11)                | 0.26    | 1          | 1.91 |
| Jiexi (ST 41)——                   | Hegu (LI 4), Zusanli (ST 36) | 0.26    | 1          | 1.5  |
| Guanyuan (RN 4)——                 | Hegu (LI 4), Zusanli (ST 36) | 0.26    | 1          | 1.5  |
| Jiexi (ST41), Guanyuan (RN4)——    | Zusanli (ST 36)              | 0.26    | 1          | 1.5  |
| Pishu (BL 20)——                   | Zusanli (ST 36)              | 0.26    | 0.92       | 1.38 |
| Taixi (KI 3)——                    | Sanyinjiao (SP 6)            | 0.26    | 1          | 2.1  |
| Taixi (KI 3)——                    | Zusanli (ST 36)              | 0.26    | 1          | 1.5  |
| Waiguan (SJ 5)——                  | Hegu (LI 4), Zusanli (ST 36) | 0.24    | 1          | 1.5  |
| Futu (ST 32)——                    | Quchi (LI 11)                | 0.24    | 1          | 1.91 |
| Waiguan (SJ 5), Futu (ST 32)——    | Zusanli (ST 36)              | 0.24    | 1          | 1.5  |
| Futu (ST 32)——                    | Hegu (LI 4), Zusanli (ST 36) | 0.24    | 1          | 1.5  |
| Guanyuan (RN 4)——                 | Sanyinjiao (SP 6)            | 0.24    | 0.91       | 1.91 |
| Guanyuan (RN 4)——                 | Quchi (LI 11)                | 0.24    | 0.91       | 1.74 |
| Guanyuan (RN 4)——                 | Qihai (RN 6)                 | 0.24    | 0.91       | 2.73 |
| Waiguan (SJ 5)——                  | Sanyinjiao (SP 6)            | 0.21    | 0.90       | 1.89 |
| Waiguan (SJ 5)——                  | Yanglingquan (GB 34)         | 0.21    | 0.90       | 1.99 |
| Waiguan (SJ 5)——                  | Quchi (LI 11)                | 0.21    | 0.90       | 1.72 |
